# Supplementary figures and images for: Mixed infections alter transmission potential in a fungal plant pathogen
Source: PubMed Central journal article supplement — Environ Microbiol. 2021 Feb 18;23(4):2315–30. doi: 10.1111/1462-2920.15417 (PMC8248022; doi:10.1111/1462-2920.15417), 2021-02-18

## cv. Drifter

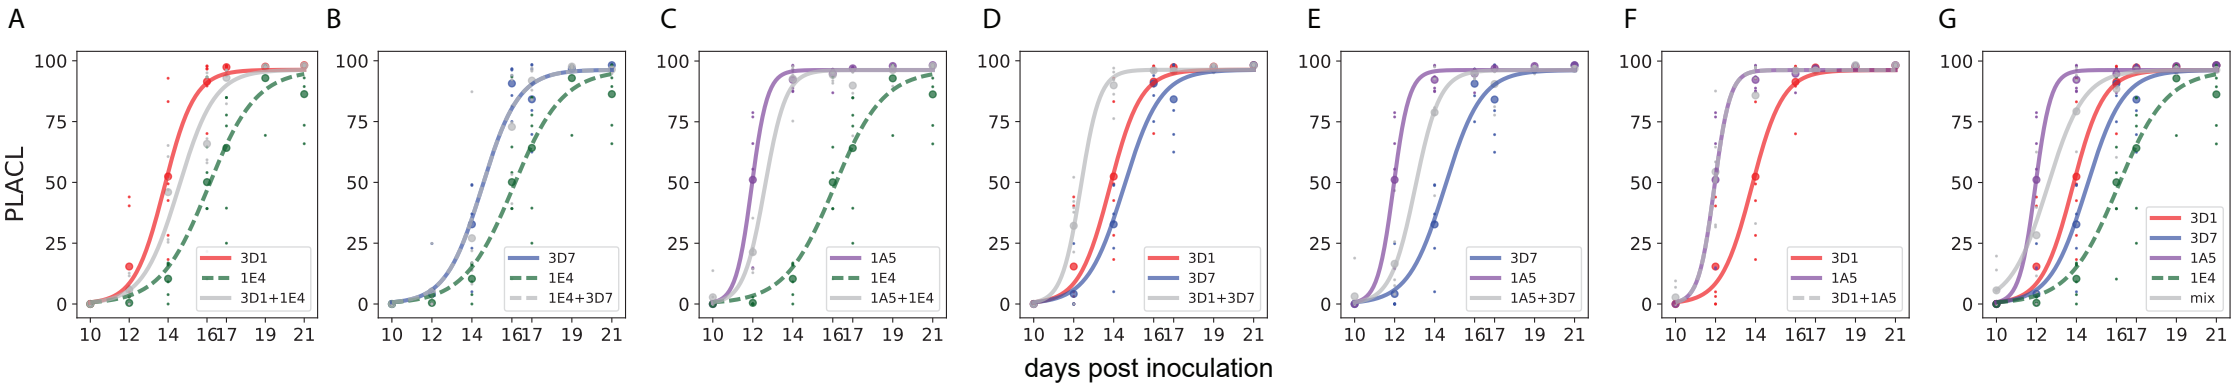

## cv. Chinese Spring

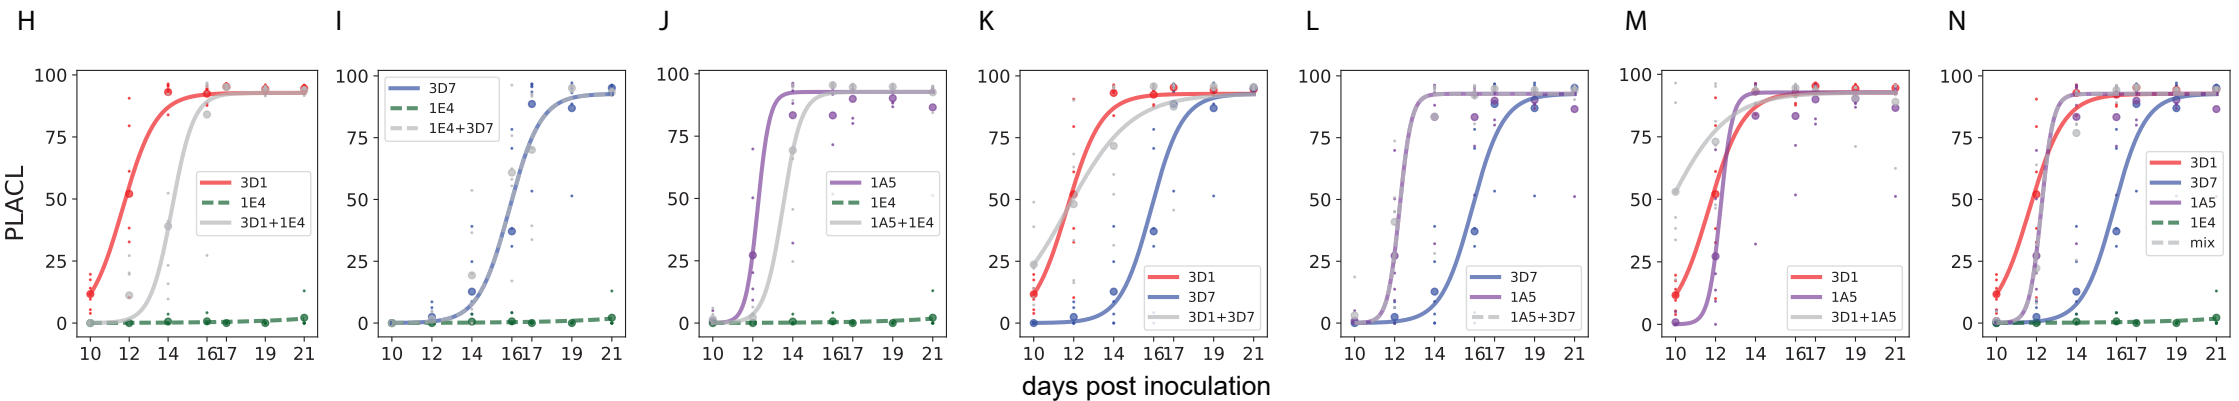

Supplement: EMI-23-2315-s008.pdf [file EMI-23-2315-s008.pdf]
